# Supplementary material for: Effects of surface water interactions with karst groundwater on microbial biomass, metabolism, and production
Source: Copernicus journal article supplement (doi:10.5194/egusphere-2024-49), 2024-02-27
Supplement: Supplementary file 1 [file egusphere-2024-49-supplement.pdf]

## SUPPLEMENTARY FIGURES AND TABLES

### To accompany the manuscript “Effects of surface water interactions with karst groundwater on microbial biomass, metabolism, and production”

Authors: Adrian Barry-Sosa<sup>1</sup>, Madison K. Flint<sup>2</sup>, Justin C. Ellena<sup>1</sup>, Jonathan B. Martin<sup>2</sup>, Brent C. Christner<sup>1</sup>

<sup>1</sup>Department of Microbiology and Cell Science, University of Florida, Gainesville, 32611, USA

<sup>2</sup>Department of Geological Sciences, University of Florida, Gainesville, 32611, USA

| Date         | Samples collected (Location)                          | Hydrological stage (Discharge; gage height, if Applicable)*                                                                                                      |
|--------------|-------------------------------------------------------|------------------------------------------------------------------------------------------------------------------------------------------------------------------|
| 6 Dec 2018   | Cell Counts, YSI (GBS-1)                              | 48.1 m <sup>3</sup> s <sup>-1</sup> , 0.3 m (GBS-1)                                                                                                              |
| 8 Apr 2019   | Cell Counts, YSI (LRS)                                | 205.3 m <sup>3</sup> s <sup>-1</sup> , 3.38 m (LRS)                                                                                                              |
| 17 Apr 2019  | Cell Counts, YSI (HS, DE)                             | N.A. (HS, DE)                                                                                                                                                    |
| 14 Jun 2019  | Cell Counts, YSI (DE, MS)                             | N.A. (DE, MS)                                                                                                                                                    |
| 15 Jun 2019  | Cell Counts, YSI (BH)                                 | N.A. (BH)                                                                                                                                                        |
| 28 Jun 2019  | Cell Counts, YSI (PKS)                                | ~15.7 m <sup>3</sup> s <sup>-1</sup> , gage heigh N.d. (PKS)                                                                                                     |
| 14 Aug 2019  | Cell Counts, YSI (GBS-1, GBS-2, RS, RR)               | 40.5 m <sup>3</sup> s <sup>-1</sup> , 0.3 m (GBS-1 and 2)<br>16.1 m <sup>3</sup> s <sup>-1</sup> , 12.1 m (RS); 17.5 m <sup>3</sup> s <sup>-1</sup> , 1.1 m (RR) |
| 27 Feb 2020  | Cell Counts, YSI (LRS)                                | 188 m <sup>3</sup> s <sup>-1</sup> , 2.9 m (LRS)                                                                                                                 |
| 23 Jul 2020  | Cell Counts (MB)                                      | 4.3 m <sup>3</sup> s <sup>-1</sup> , 2.88 m (MB)                                                                                                                 |
| 23 Oct 2020  | YSI, ATP (DE, MS)                                     | N.A. (DE, MS)                                                                                                                                                    |
| 21 Nov 2020  | YSI, ATP (PKS, LRS, MS, HS, DE)                       | N.d. (PKS) 103.9 m <sup>3</sup> s <sup>-1</sup> , 1.9 m (LRS); N.A. (MS, HS, DE)                                                                                 |
| 30 Jan 2021  | Cell Counts, YSI, ATP (RS, RR)                        | 3.2 m <sup>3</sup> s <sup>-1</sup> , 11.2 m (RS); 5.9 m <sup>3</sup> s <sup>-1</sup> , 0.7 m (RR)                                                                |
| 28 Feb 2021  | Cell Counts, YSI, ATP (MB)                            | <u>-1.3 m<sup>3</sup> s<sup>-1</sup>, 8.2 m (MB)</u>                                                                                                             |
| 4 Mar 2021   | YSI, ATP (HS)                                         | N.A. (HS)                                                                                                                                                        |
| 11 Mar 2021  | YSI, ATP (RR)                                         | <u>27 m<sup>3</sup> s<sup>-1</sup>, 1.5 m (RR)</u>                                                                                                               |
| 10 Apr 2021  | Cell Counts, YSI (DE)                                 | N.A. (DE)                                                                                                                                                        |
| 28 Jul 2021  | YSI, Rad, Ox. incubation (DE, HS)                     | N.A. (DE, HS)                                                                                                                                                    |
| 10 Aug 2021  | YSI, ATP (PKS, CS)                                    | N.A. (PKS), N.A. (CS)                                                                                                                                            |
| 25 Aug 2021  | YSI, ATP (BH)                                         | N.A. (BH)                                                                                                                                                        |
| 13 Sept 2021 | YSI, Ox. incubation (DE)                              | N.A. (DE)                                                                                                                                                        |
| 28 Oct 2021  | YSI, ATP (GBS-1, GBS-2, MB, PKS)                      | 44.2 m <sup>3</sup> s <sup>-1</sup> , 0.4 m (GBS-1 and 2)<br>N.d. (PKS)                                                                                          |
| 4 Nov 2021   | YSI (DE, RS, RR); DIC (DE); Cell counts, Rad (RS, RR) | 7.44 m <sup>3</sup> s <sup>-1</sup> , 11.5 m (RS); 15.71 m <sup>3</sup> s <sup>-1</sup> , 1.1 m (RR); N.A. (DE)                                                  |
| 1 Dec 2021   | YSI, Ox. incubation (RS, RR)                          | 7.9 m <sup>3</sup> s <sup>-1</sup> , 11.6 m (RS); 14.9 m <sup>3</sup> s <sup>-1</sup> , 1.1 m (RR)                                                               |
| 26 Jan 2022  | YSI, DIC (RS, RR, HS)                                 | N.A. (HS); 6.6 m <sup>3</sup> s <sup>-1</sup> , 11.5 m (RS); 8.9 m <sup>3</sup> s <sup>-1</sup> , 0.9 (RR)                                                       |
| 7 Mar 2022   | YSI, Rad, Ox. incubation (MB)                         | 4.30 m <sup>3</sup> s <sup>-1</sup> , 2.85 m (MB)                                                                                                                |
| 31 Mar 2022  | YSI, DIC, Ox. incubation (MB)                         | 4.8 m <sup>3</sup> s <sup>-1</sup> , 4.7 m (MB)                                                                                                                  |
| 8 Apr 2022   | YSI, DIC, Ox. incubation (RS)                         | <u>37.9 m<sup>3</sup> s<sup>-1</sup>, 12.9 m (RS)</u>                                                                                                            |
| 21 Apr 2022  | YSI, DIC, POC (DE, HS)                                | N.A. (DE, HS)                                                                                                                                                    |
| 2 Jun 2022   | YSI, DIC, POC (RS, RR)                                | 4.6 m <sup>3</sup> s <sup>-1</sup> , 11.3 m (RS); 11.1 m <sup>3</sup> s <sup>-1</sup><br>gage height N.d (RR)                                                    |
| 12 Jul 2022  | Cell counts, YSI, Rad, POC (MB)                       | 3.09 m <sup>3</sup> s <sup>-1</sup> , 2.7 m (MB)                                                                                                                 |

|             |                                                 |                                                        |
|-------------|-------------------------------------------------|--------------------------------------------------------|
| 22 Sep 2022 | YSI, DIC, Rad, POC, Ox. incubation (RS)         | <u>37.66 m<sup>3</sup> s<sup>-1</sup>, 12.8 m (RS)</u> |
| 27 Sep 2022 | YSI, DIC, Rad, POC, Ox. incubation (RR)         | <u>28 m<sup>3</sup> s<sup>-1</sup>, 1.5 m (RR)</u>     |
| 1 Dec 2022  | Cell Counts, YSI, DIC, Rad, Ox. incubation (MB) | 3.14 m <sup>3</sup> s <sup>-1</sup> , 2.45 m (MB)      |

**Table S1.** List of sampled dates, indicating the specific samples taken at each location. \*Hydrological data for each location retrieved from the following USGS monitoring stations: GBS-1 and 2 02322500<sup>+</sup>, LRS 02320500<sup>+</sup>, MB 02319302, RR 02321958 and RS 02321898. For PKS, the SRWMD station 02320048 was used. Stations marked with <sup>+</sup> indicates that the monitoring station was not located at the sampling location, so the closest monitoring station at the nearby river was used instead. Underlined locations denote times when the flow was high (RR and RS) or samples collected during a reversal (MB and PKS). Acronyms: MB: Madison Blue Spring; PKS: Peacock Spring; LRS: Little River Spring; DE: Devil's Eye Spring; HS: Head Spring; BH: Blue Hole Spring; MS: Mission Spring; CS: Coffee Spring. GBS: Gilchrist Blue Springs; RS: Santa Fe River Sink; RR: Santa Fe River Rise. YSI: Measurements using the multiparameter YSI ProDSS probe; DIC: Samples for dissolved inorganic carbon consumption measurements; POC: Samples for measuring particulate organic carbon; Rad: Samples for radioisotopic incubations, Ox. Incubation: samples for oxygen production measurements; ATP: Samples for measuring ATP concentrations.

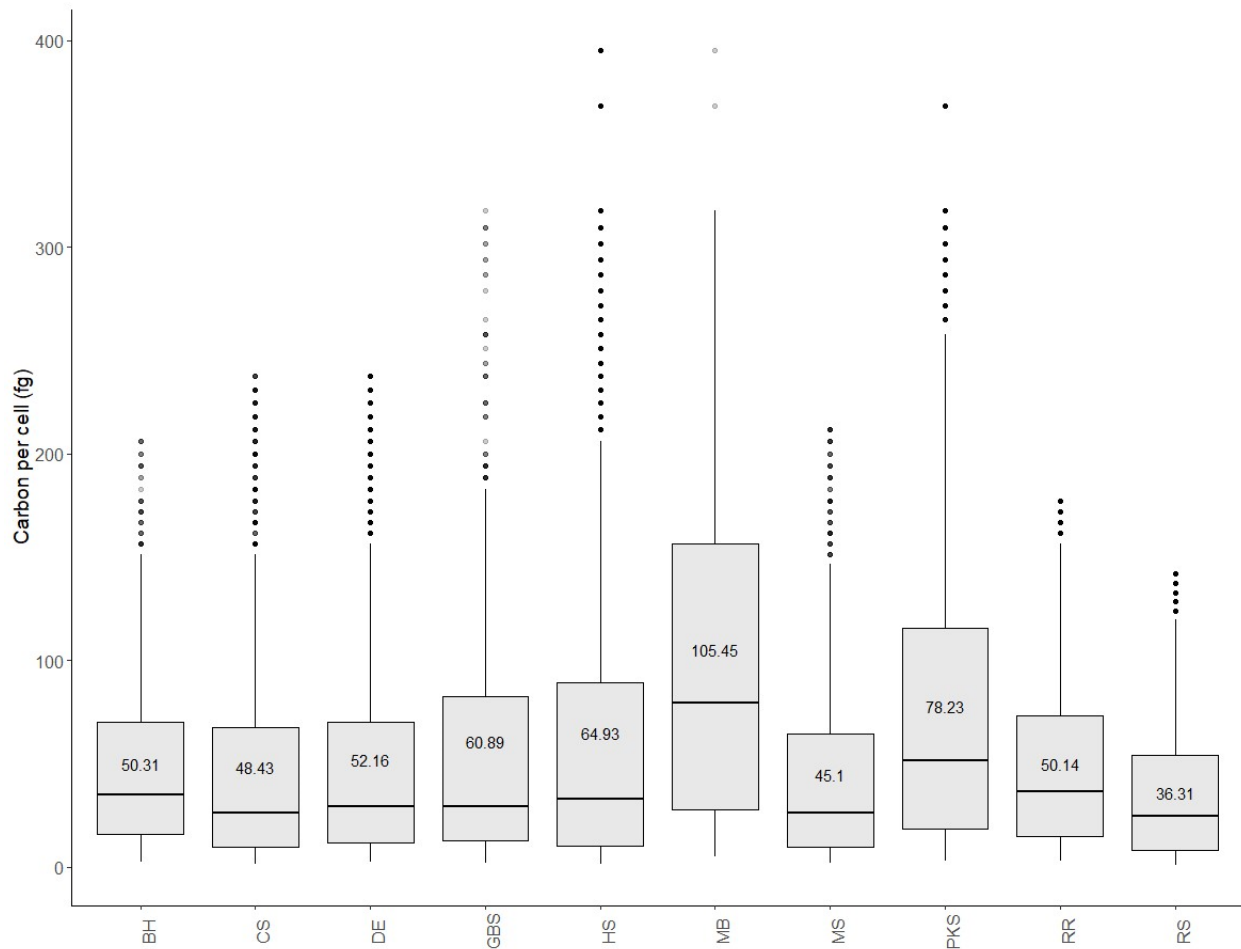

**Figure S1.** Cell Carbon per cell. Numbers within the box plot indicate the average values.

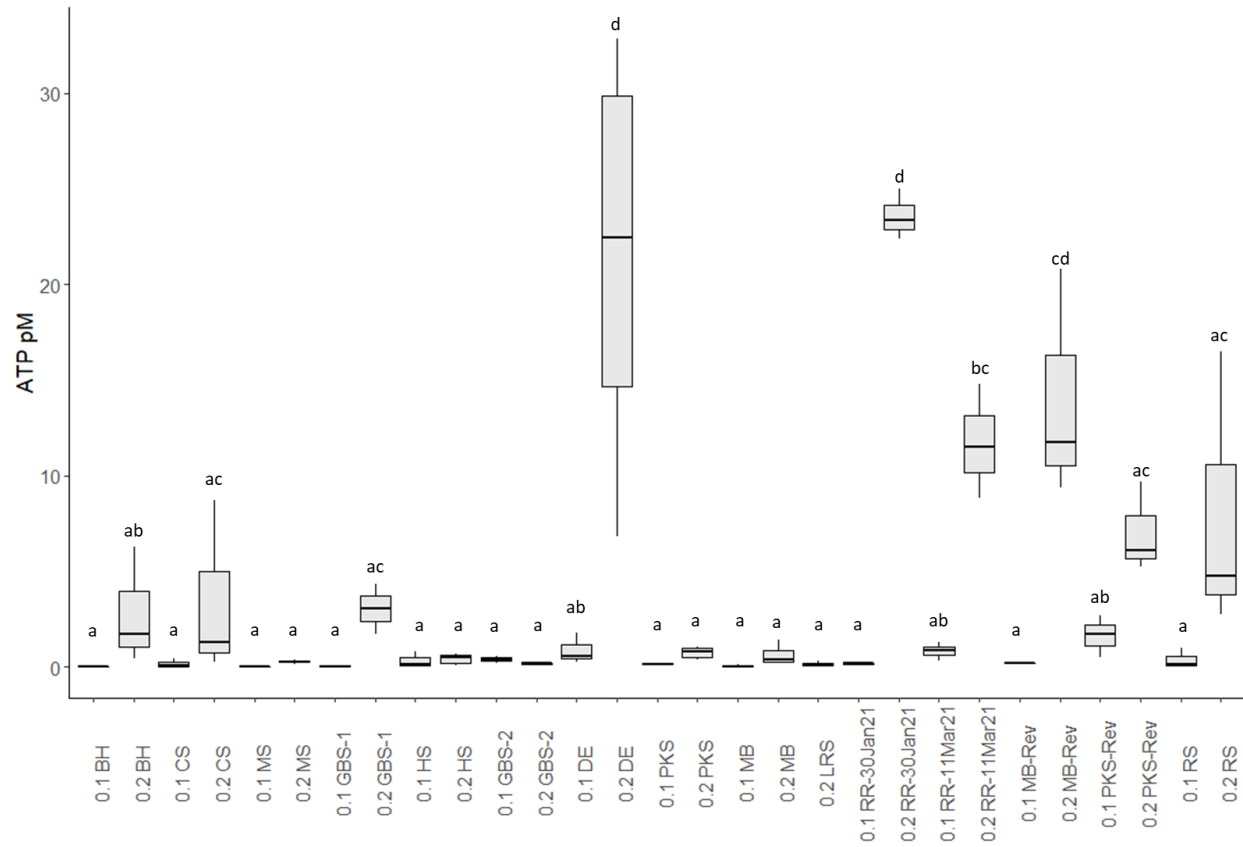

**Figure S2.** Bulk ATP concentration measured at each location in the 0.1 and 0.2 μm fraction.

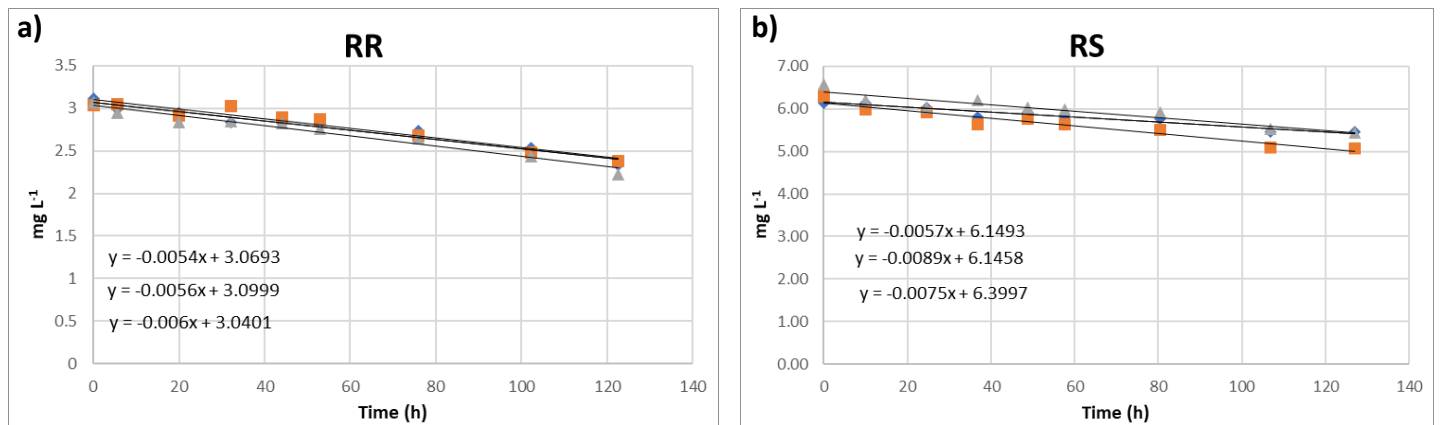

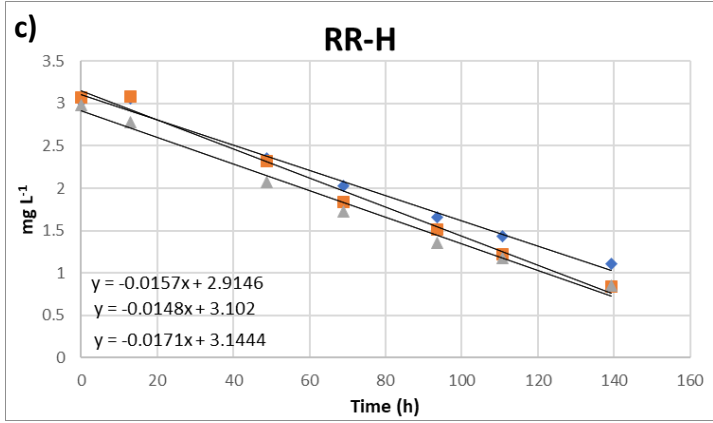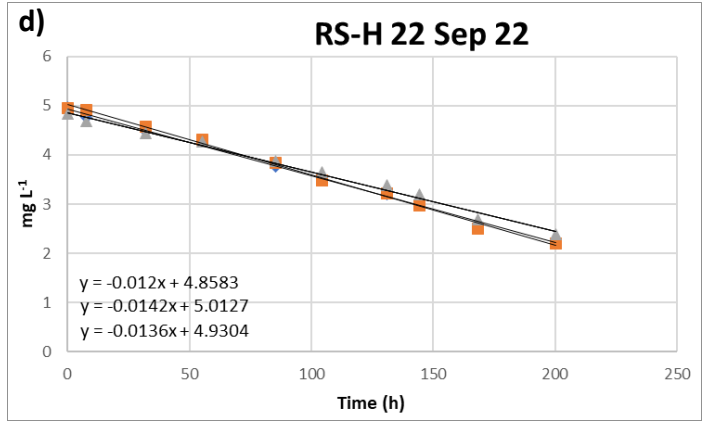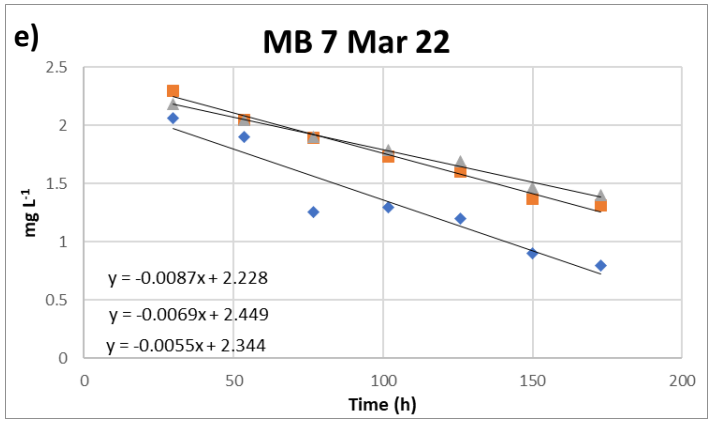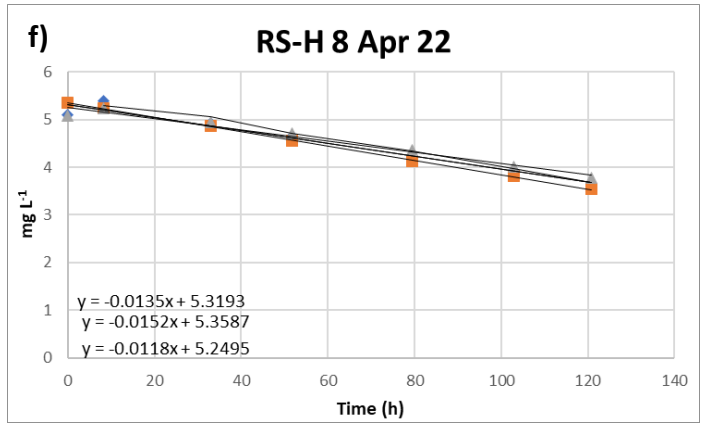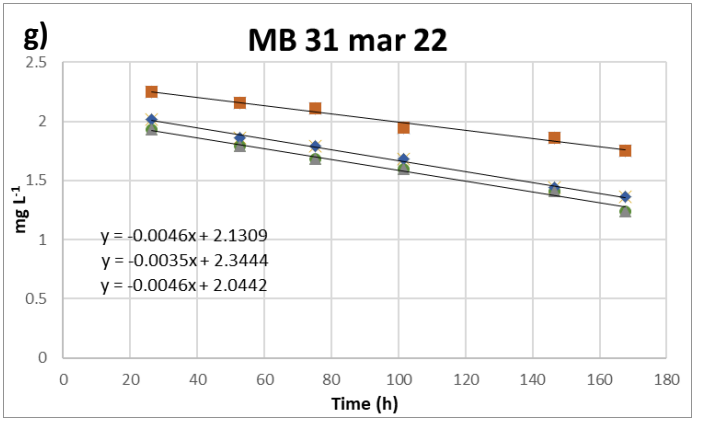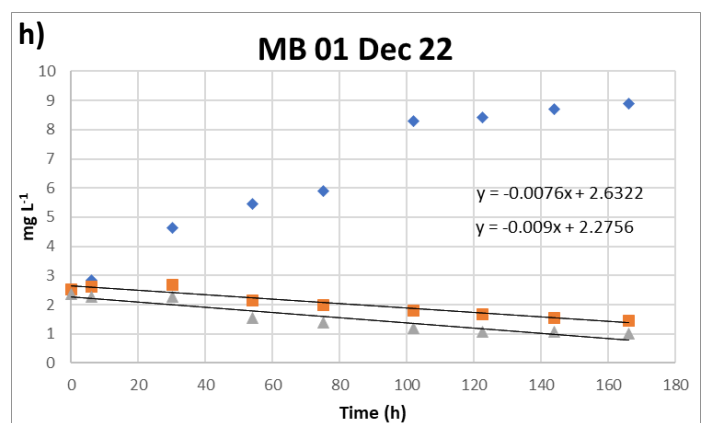

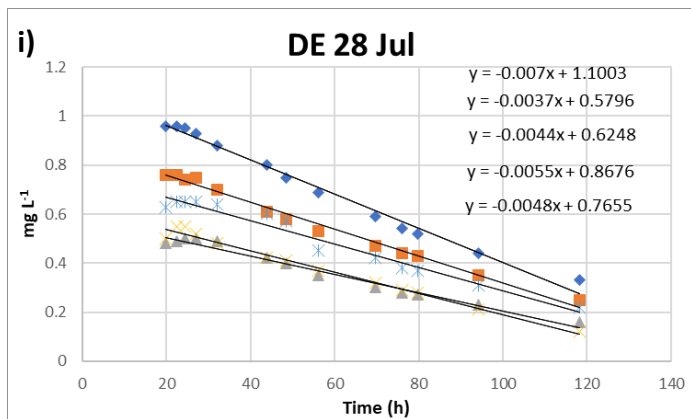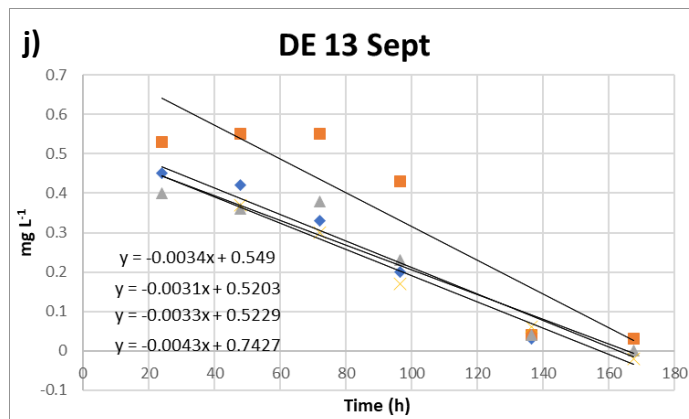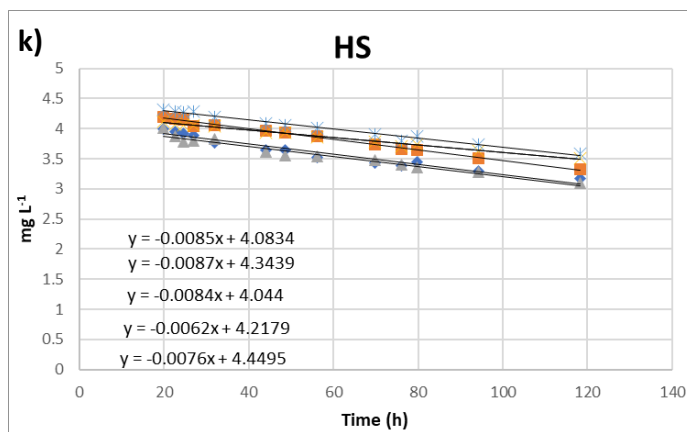

Figure S3. Individualized oxygen consumption rates (In mg of oxygen per liter).

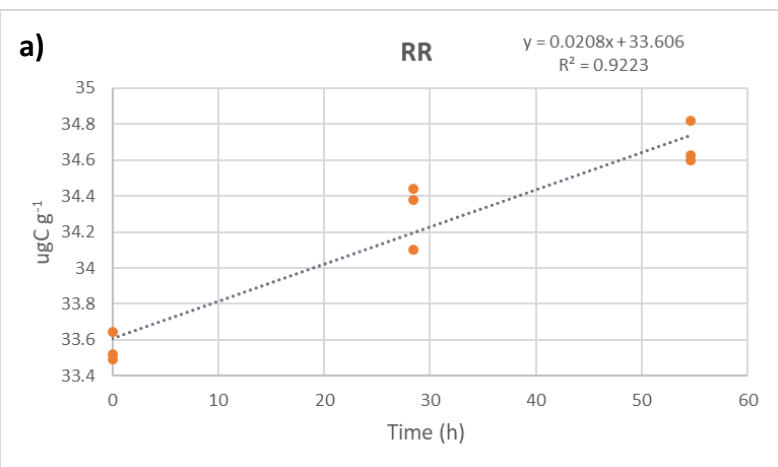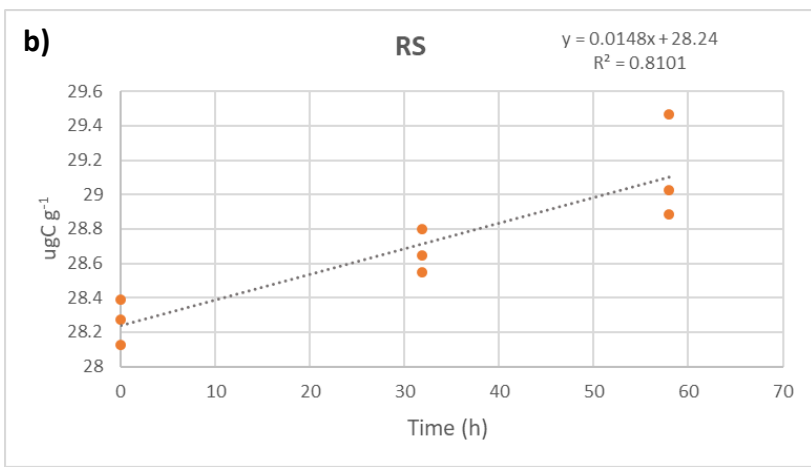

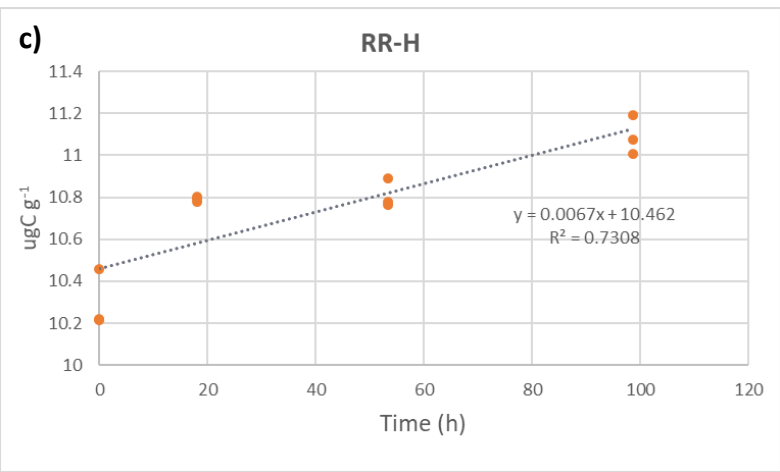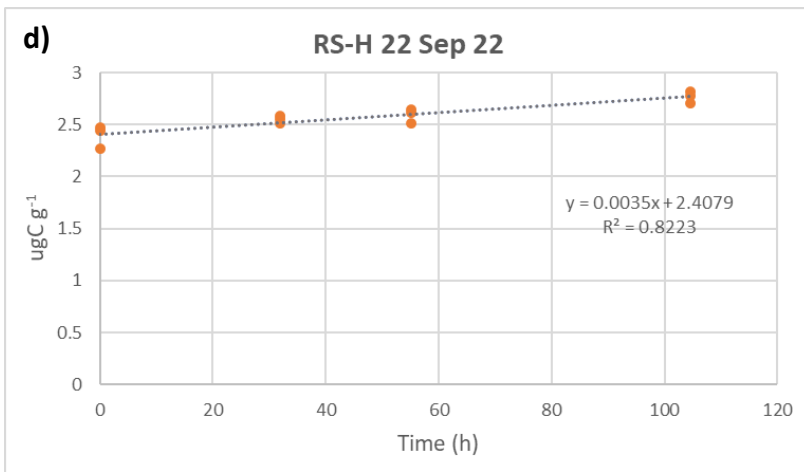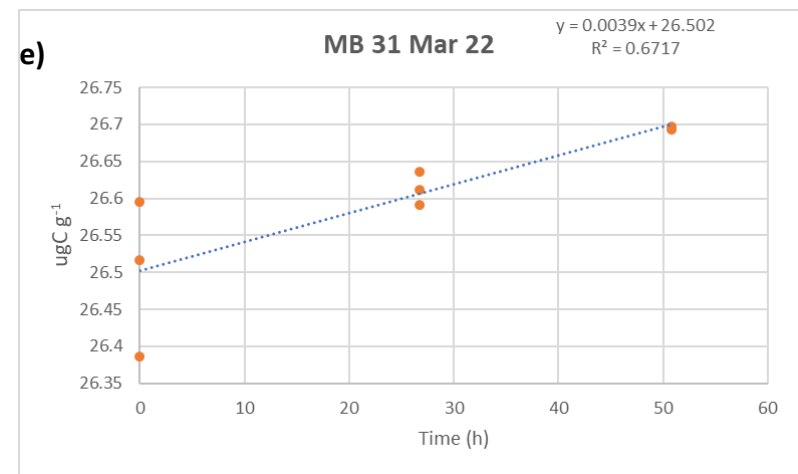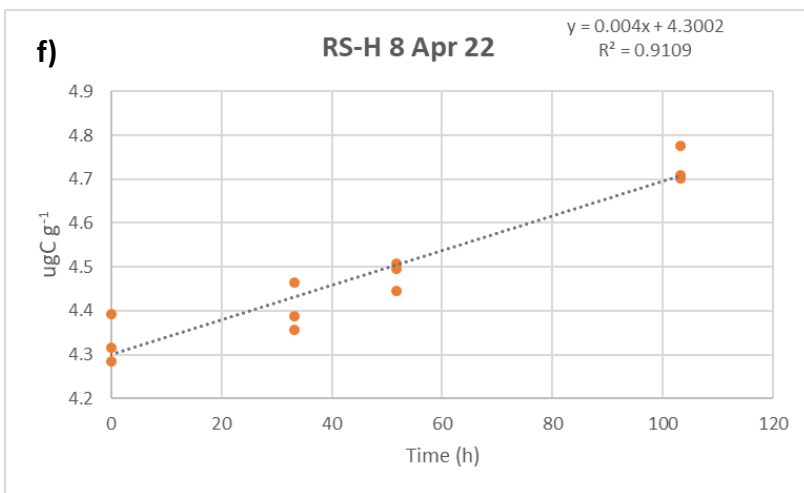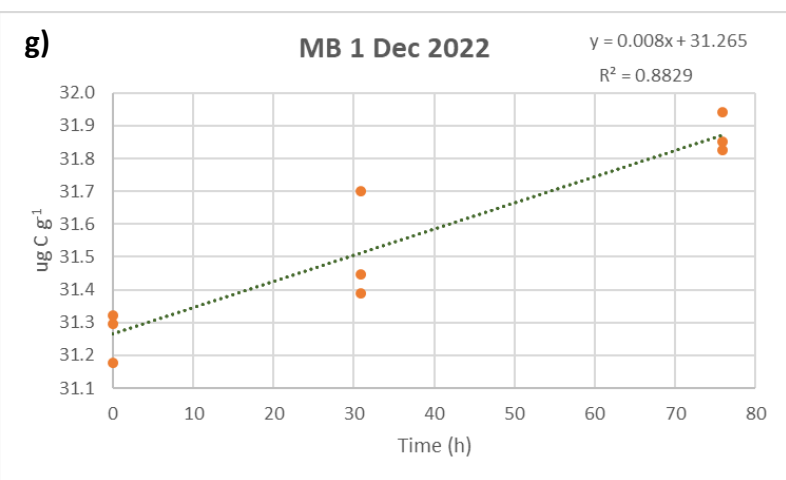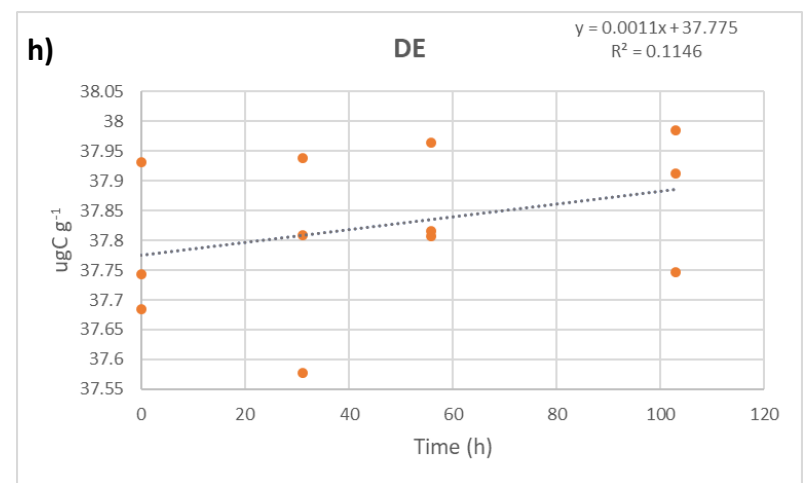

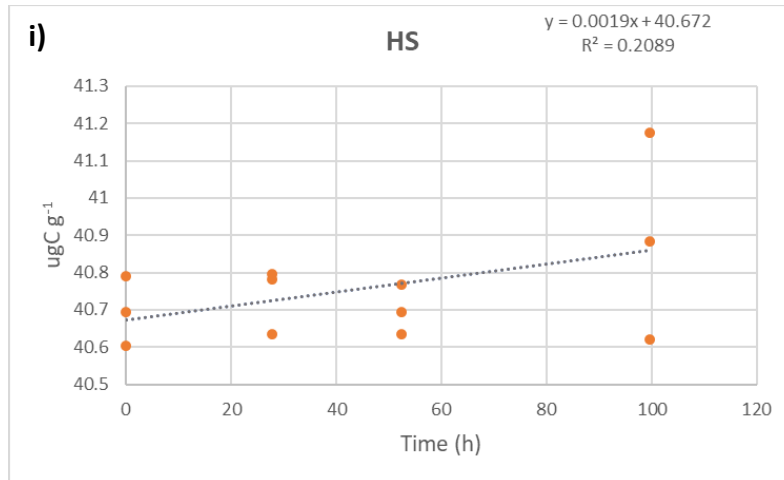

**Figure S4.** Individualized DIC production rates.

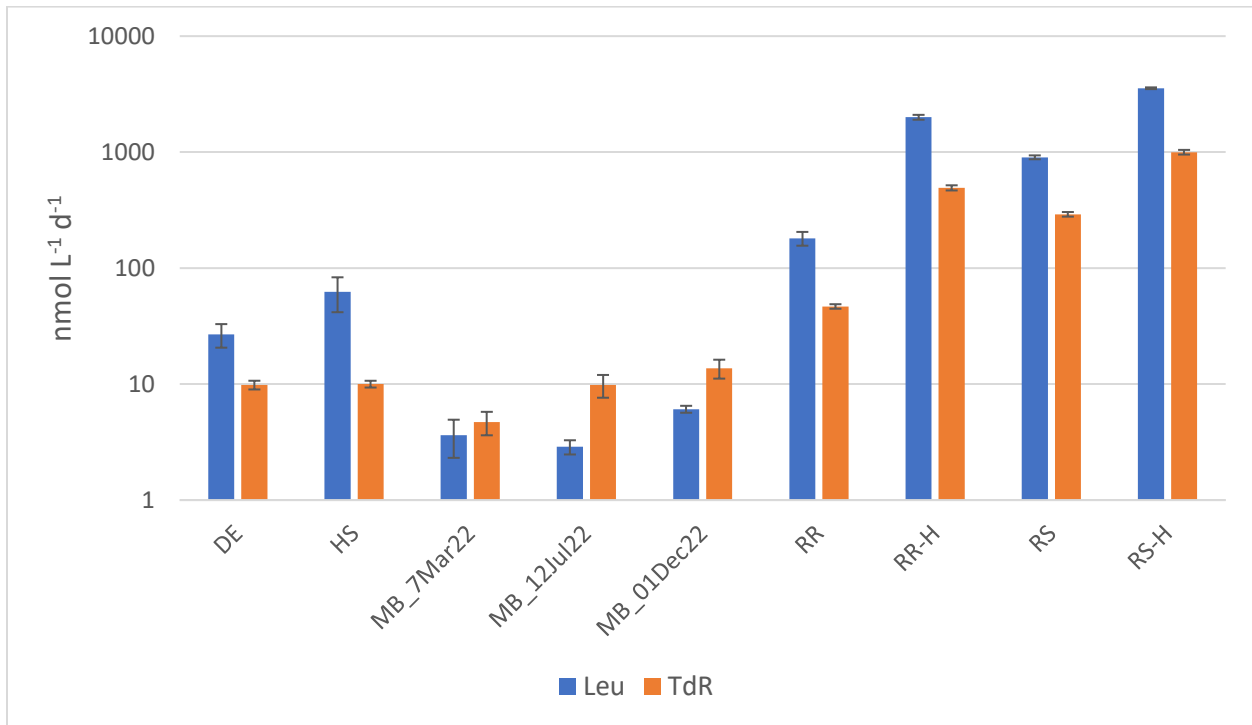

**Figure S5.** Bulk molar incorporation rates of <sup>3</sup>H-leucine and <sup>3</sup>H-thymidine. The H at sink-rise samples (RR and RS) indicates samples taken during high flow, to differentiate them from the others, taken at low flow.

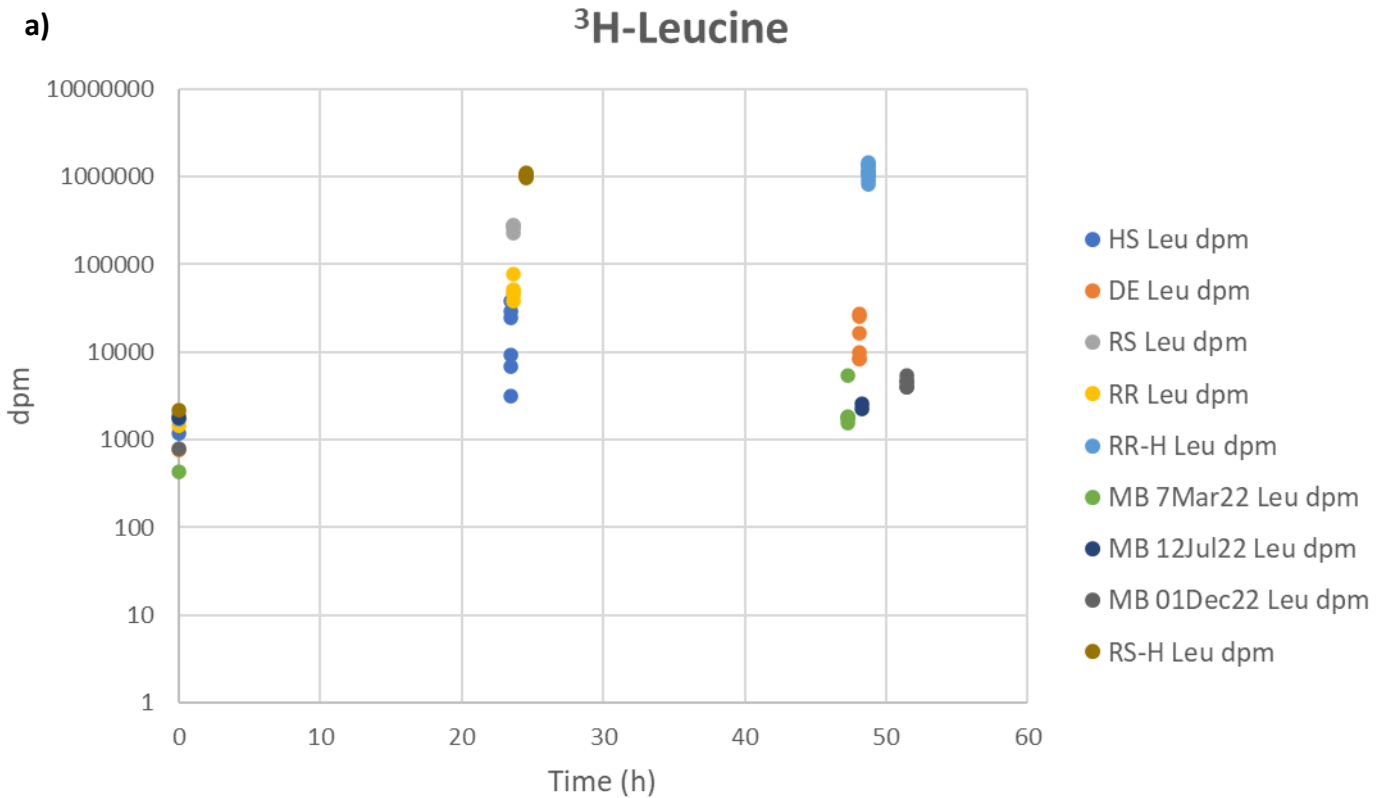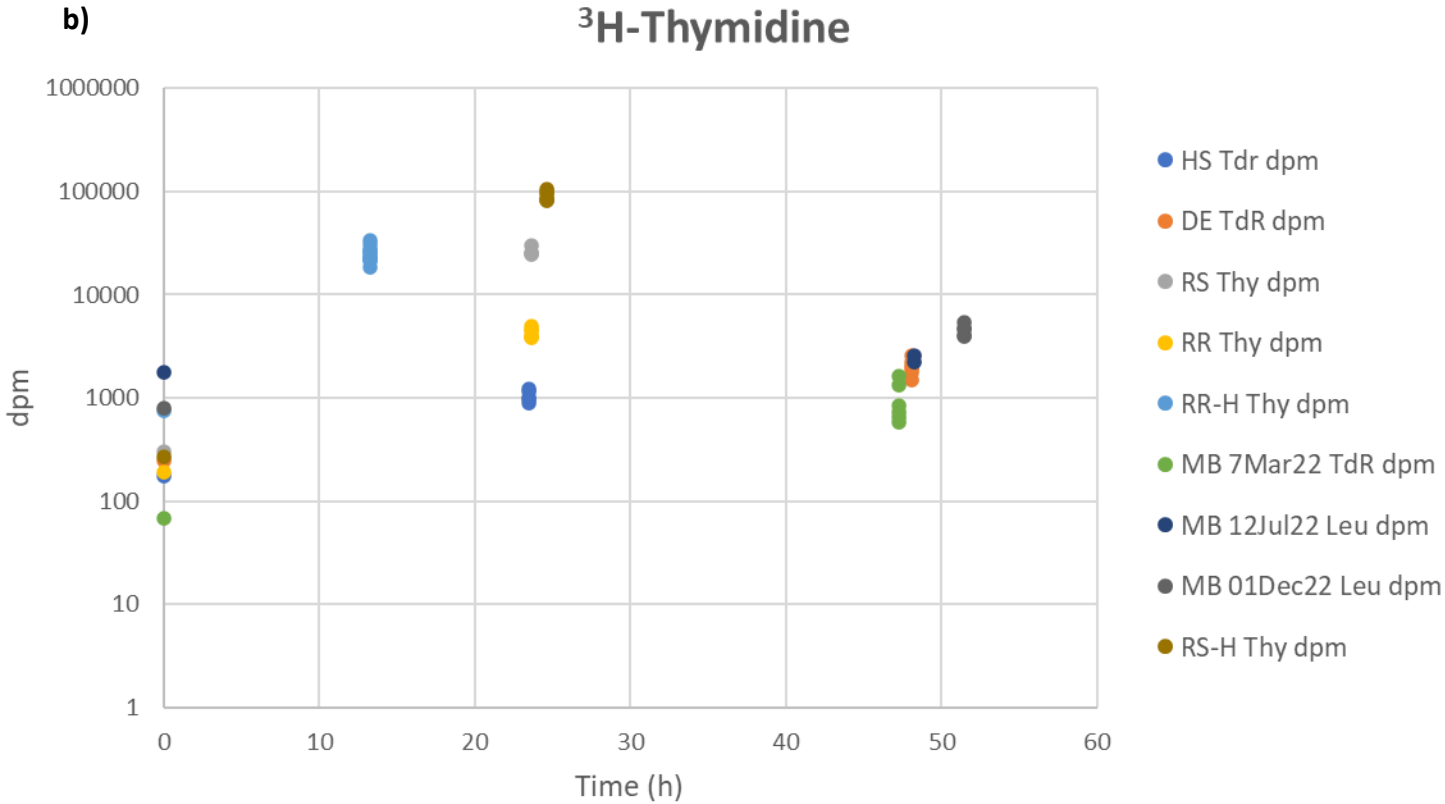

**Figure S6.** Radioisotopic incubation dpm's over time for a) leucine and b) thymidine.



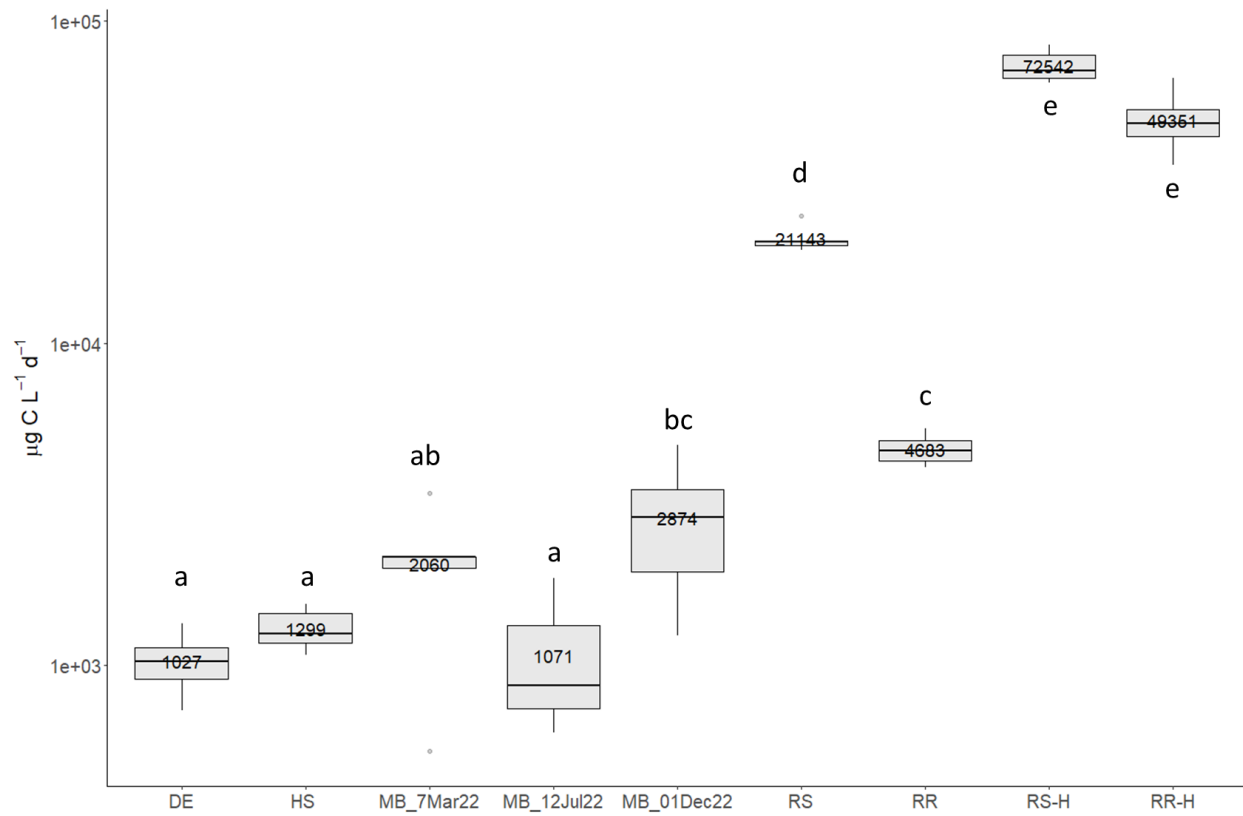

**Figure S7.** Rates of bulk carbon incorporation derived from <sup>3</sup>H-thymidine. Numbers within the box plot indicate the average values.
